# Supplementary material for: Isolation and Molecular Characterization of Atypical Porcine Pestivirus Emerging in China
Source: MDPI journal article supplement (doi:10.3390/v15112149), 2023-10-25
Supplement: s1 [file s1]

**Table S1.** PCR primers used for whole genome analysis of the APPV.

| Primer   | Sequence (5'→3')        | Size (bp) |
|----------|-------------------------|-----------|
| APPV-1F  | AGCTCTGCAGTACGTGGGGG    | 1177      |
| APPV-1R  | AGGCACATCACCAGGGCTATGT  |           |
| APPV-2F  | GAAGGGGATGTAGTGAAAGT    | 1048      |
| APPV-2R  | CGGGGAGCTCTACTGTGATAT   |           |
| APPV-3F  | TACGGAACCTGAATGGTTGGAAC | 1211      |
| APPV-3R  | AAGGCCACAAGACTTGCAGT    |           |
| APPV-4F  | CACCCTAACTCTATGGAAGAT   | 1317      |
| APPV-4R  | GTGACGTGTTTGGCACTGCT    |           |
| APPV-5F  | GTCCACTCGACAAGGAAACT    | 1367      |
| APPV-5R  | CTTACCAGTGAGGTGACAAT    |           |
| APPV-6F  | TTGACGTGGTCATAGACACT    | 1423      |
| APPV-6R  | ACCACCACTGCTGATTCCAT    |           |
| APPV-7F  | CCGATTACTTGCCCTATGCT    | 1398      |
| APPV-7R  | GATGGCATTTCGTAGCCCTCT   |           |
| APPV-8F  | GTGCTAAGTCCCTGCTACCT    | 1297      |
| APPV-8R  | AGGCCGCCCACATTTTTCGT    |           |
| APPV-9F  | AAACACCTCTGGCCCAAAT     | 1225      |
| APPV-9R  | AGTTGATAGCAACAGGAGGCT   |           |
| APPV-10F | GTGGCATTTCGCATATTTACT   | 820       |
| APPV-10R | GGCCCCCTTGCTTCATCTAG    |           |

**Table S2.** Sequence identities between the APPV China/HLJ491/2017 strain in this study and representative APPV strains in GenBank (nt/aa%).

| Strain            | Genotype | ORF       | N <sup>pro</sup> | C         | E <sup>1ns</sup> | E1        | E2        | P7        | NS2       | NS3       | NS4A      | NS4B      | NS5A      | NS5B      |
|-------------------|----------|-----------|------------------|-----------|------------------|-----------|-----------|-----------|-----------|-----------|-----------|-----------|-----------|-----------|
| ISDVDL2014016573  | 1        | 83.3/92.4 | 81.1/83.9        | 83.5/89.2 | 82.9/93.3        | 85.3/94.0 | 86.2/93.4 | 77.7/92.2 | 82.5/92.7 | 85.8/97.7 | 85.1/94.0 | 83.5/96.5 | 80.1/85.6 | 82.8/91.2 |
| APPV_GER_01       | 1        | 83.4/92.2 | 79.6/82.2        | 83.5/88.3 | 83.0/91.9        | 84.6/93.0 | 85.5/92.9 | 79.8/93.8 | 83.1/93.0 | 85.6/97.5 | 82.1/92.5 | 83.7/96.2 | 80.3/85.6 | 83.8/91.9 |
| Ger-NRW_L277      | 1        | 83.4/92.3 | 80.0/82.8        | 82.3/88.3 | 83.5/92.4        | 85.4/94.0 | 85.5/92.5 | 80.7/92.2 | 82.8/93.0 | 85.8/97.5 | 82.1/92.5 | 84.1/96.2 | 80.0/85.4 | 83.4/92.0 |
| NL1_Farm1         | 1        | 83.3/92.0 | 81.5/81.1        | 82.6/85.6 | 82.2/93.8        | 86.1/94.5 | 85.5/92.1 | 82.4/93.8 | 82.3/93.3 | 85.8/96.9 | 81.6/97.0 | 83.3/95.9 | 79.7/85.2 | 83.0/91.2 |
| AUT-2016_C        | 1        | 83.3/91.9 | 79.6/82.8        | 83.5/88.3 | 82.7/91.0        | 85.6/95.0 | 85.5/93.8 | 79.8/90.6 | 82.5/91.7 | 84.8/96.9 | 84.1/92.5 | 85.3/96.2 | 80.0/85.4 | 83.2/91.3 |
| SK68-11           | 1        | 83.2/92.3 | 79.4/82.2        | 84.4/88.3 | 81.7/91.9        | 84.1/94.5 | 85.6/94.2 | 80.3/90.6 | 82.0/92.7 | 86.7/97.8 | 81.6/94.0 | 84.8/96.2 | 78.7/85.6 | 83.2/91.5 |
| KU16-6            | 1        | 83.0/91.7 | 80.2/83.3        | 83.5/89.2 | 82.1/92.9        | 84.1/93.5 | 84.1/92.5 | 80.8/95.3 | 83.1/92.0 | 85.5/96.4 | 81.1/91.0 | 84.0/94.1 | 79.5/86.0 | 83.1/90.8 |
| China/SWU-KZ/2018 | 1        | 83.1/92.1 | 79.6/81.1        | 82.6/89.2 | 81.9/90.5        | 83.9/94.5 | 84.8/92.1 | 81.3/89.1 | 82.9/91.7 | 85.6/97.2 | 84.6/97.0 | 83.4/96.2 | 80.8/87.3 | 83.4/91.2 |
| APPV_GD           | 1        | 83.2/91.6 | 80.9/83.9        | 82.9/86.5 | 82.2/91.9        | 84.4/93.0 | 85.2/95.4 | 80.8/90.6 | 82.5/92.7 | 84.5/95.8 | 84.6/91.0 | 84.0/95.6 | 80.1/85.0 | 83.9/90.8 |
| GX01-2018         | 1        | 83.5/92.4 | 78.7/81.7        | 84.4/91.0 | 83.0/91.0        | 84.6/96.0 | 84.5/93.8 | 80.3/92.2 | 84.6/94.3 | 85.7/97.1 | 83.6/95.5 | 84.0/96.5 | 79.7/85.8 | 83.8/91.1 |
| GX02-2018         | 1        | 83.5/92.4 | 81.3/82.2        | 78.4/86.5 | 81.6/94.8        | 86.1/94.5 | 86.4/94.2 | 83.4/93.8 | 82.4/93.3 | 86.2/97.1 | 83.6/95.5 | 84.7/96.8 | 79.7/84.5 | 83.4/92.0 |
| China/HeNLY/2017  | 1        | 82.9/92.2 | 79.8/82.8        | 83.5/89.2 | 82.1/93.3        | 83.9/94.0 | 83.8/92.5 | 82.4/95.3 | 83.3/92.4 | 85.3/96.9 | 80.1/94.0 | 84.4/95.3 | 79.2/86.2 | 83.2/91.3 |
| VIRES_NM01_C1     | 2        | 97.6/98.9 | 95.6/97.2        | 98.8/100  | 98.7/99.0        | 97.2/99.0 | 97.1/96.7 | 95.8/100  | 97.8/99.0 | 97.5/99.7 | 96.0/98.5 | 98.0/99.4 | 97.8/98.9 | 97.9/98.9 |
| CH-GD2017         | 2        | 93.5/97.3 | 92.6/93.3        | 94.6/98.2 | 92.9/96.2        | 93.0/95.5 | 93.1/95.0 | 91.7/95.3 | 93.7/98.1 | 94.1/99.0 | 94.5/100  | 93.9/99.1 | 92.7/96.8 | 93.5/96.9 |
| GD-YJHSEY3N       | 2        | 93.7/97.9 | 93.1/95.0        | 94.9/98.2 | 93.5/98.6        | 93.5/96.5 | 93.4/95.4 | 92.2/96.9 | 94.2/98.4 | 94.4/99.7 | 94.0/100  | 93.6/99.1 | 92.8/97.0 | 93.7/97.7 |
| GD1               | 2        | 93.5/97.5 | 92.8/94.4        | 94.9/98.2 | 93.7/98.6        | 93.1/95.5 | 93.1/95.0 | 91.2/93.8 | 93.7/97.5 | 94.2/99.4 | 94.0/100  | 93.6/98.8 | 92.6/96.6 | 93.7/97.3 |
| GD-BH02-2018      | 2        | 93.6/97.6 | 93.0/94.4        | 94.9/99.1 | 93.5/98.1        | 93.5/96.5 | 93.4/95.0 | 91.7/95.3 | 94.1/98.1 | 94.1/99.4 | 94.5/100  | 93.6/98.8 | 92.5/96.6 | 93.8/97.6 |
| China/SWU-MY/2018 | 2        | 93.5/97.4 | 92.2/92.8        | 94.9/97.3 | 94.1/98.6        | 92.5/96.5 | 93.6/96.3 | 91.7/93.8 | 93.0/97.5 | 94.2/99.1 | 95.0/100  | 93.7/98.2 | 92.1/96.4 | 94.1/97.6 |
| China/GD-SD/2016  | 2        | 93.3/97.1 | 92.6/93.9        | 94.6/96.4 | 92.9/96.2        | 91.5/95.5 | 92.0/94.2 | 92.2/100  | 93.6/97.5 | 93.9/99.1 | 96.0/98.5 | 93.2/98.2 | 92.6/96.8 | 94.0/97.1 |
| GX02-2019         | 2        | 93.5/97.4 | 92.6/93.3        | 94.6/98.2 | 93.5/97.1        | 92.6/96.5 | 93.4/94.6 | 89.6/98.4 | 94.7/97.1 | 94.1/99.3 | 91.0/97.0 | 93.8/98.8 | 92.3/96.6 | 94.1/97.5 |
| GD-ZW-2017.10     | 3        | 81.0/91.1 | 78.0/81.7        | 81.7/91.9 | 80.6/93.3        | 80.4/93.0 | 80.6/91.3 | 78.8/89.1 | 81.0/91.7 | 84.7/96.7 | 77.6/91.0 | 80.9/95.6 | 77.6/83.3 | 81.2/89.9 |
| AH-GL-2017.04     | 3        | 80.9/91.1 | 77.6/81.7        | 81.4/91.9 | 79.8/93.3        | 80.2/93.5 | 80.6/90.0 | 78.8/90.6 | 80.7/91.1 | 84.8/96.8 | 77.6/91.0 | 80.9/95.6 | 77.9/83.7 | 81.4/89.6 |
| GD-MH01-2018      | 3        | 80.8/91.1 | 77.8/82.2        | 81.7/91.9 | 80.0/92.9        | 80.6/93.5 | 80.8/92.5 | 78.2/90.6 | 80.4/91.1 | 84.3/96.4 | 77.6/91.0 | 80.5/95.0 | 77.5/83.7 | 81.3/89.6 |
| Annaka/2020       | 3        | 80.9/90.9 | 76.7/82.8        | 82.3/91.9 | 80.2/91.0        | 81.2/92.0 | 80.5/90.5 | 78.2/92.2 | 81.3/89.5 | 83.0/96.9 | 81.1/91.0 | 81.8/95.6 | 77.5/83.3 | 82.0/90.1 |
